# Supplementary material
Source: PubMed Central journal article supplement (PMC5642957)
Supplement: NIHMS908737-supplement-supplement_1.pdf [file NIHMS908737-supplement-supplement_1.pdf]

Model for maintenance of gut homeostasis by microbiota-induced epithelial PPAR- $\gamma$  signaling

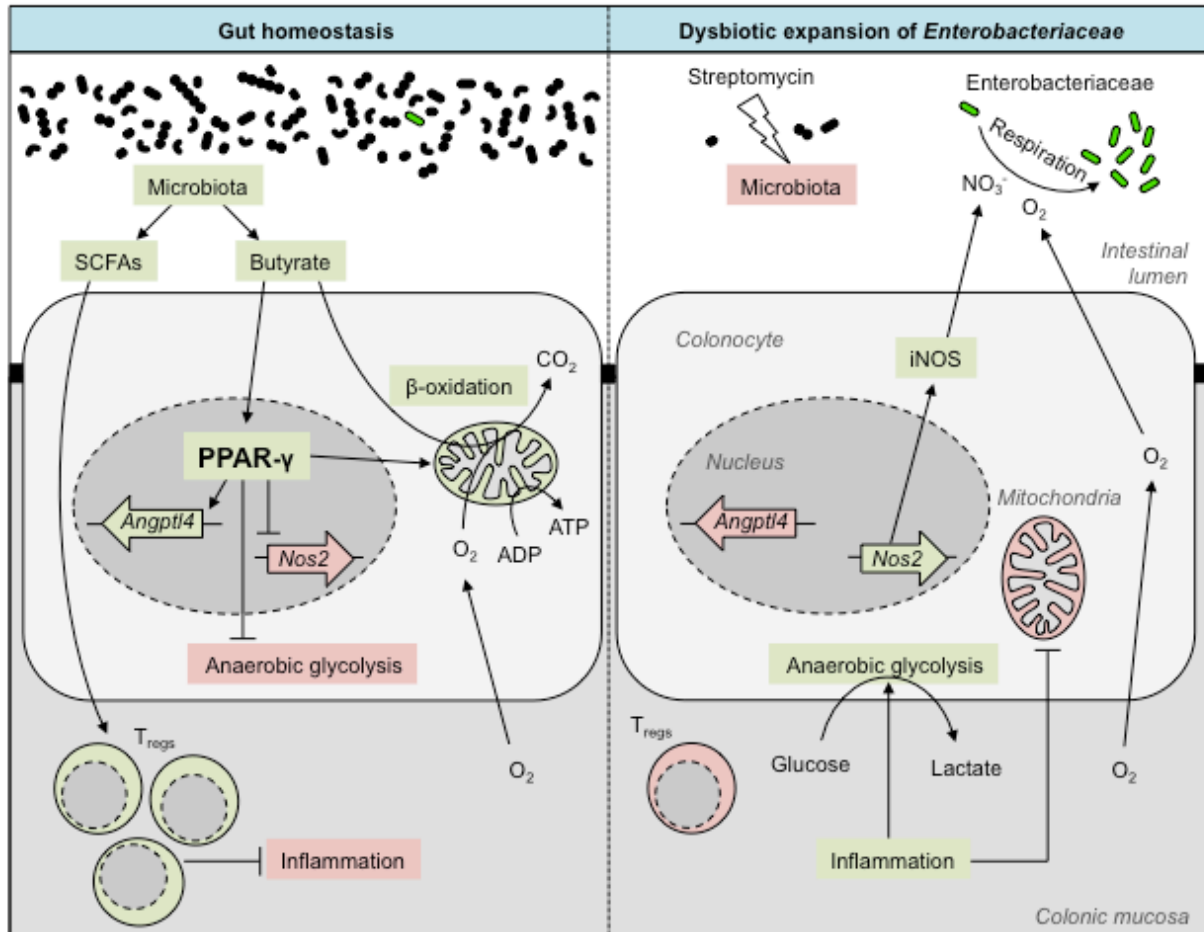

1  
 2 **Figure S1: Microbiota-induced epithelial PPAR- $\gamma$  signaling limits a dysbiotic expansion of**  
 3 ***Enterobacteriaceae*.** Schematic showing how microbiota-induced epithelial PPAR- $\gamma$  signaling  
 4 maintains gut homeostasis by limiting the luminal bioavailability of oxygen ( $O_2$ ) and nitrate ( $NO_3^-$   
 5 ). SCFAs, short-chain fatty acids;  $T_{regs}$ , regulatory T cells; *Angptl4*, the gene encoding  
 6 Angiopoetin-like 4; *Nos2*, the gene encoding inducible nitric oxide synthase (iNOS);  $NO_3^-$ ,  
 7 nitrate;  $O_2$ , oxygen.

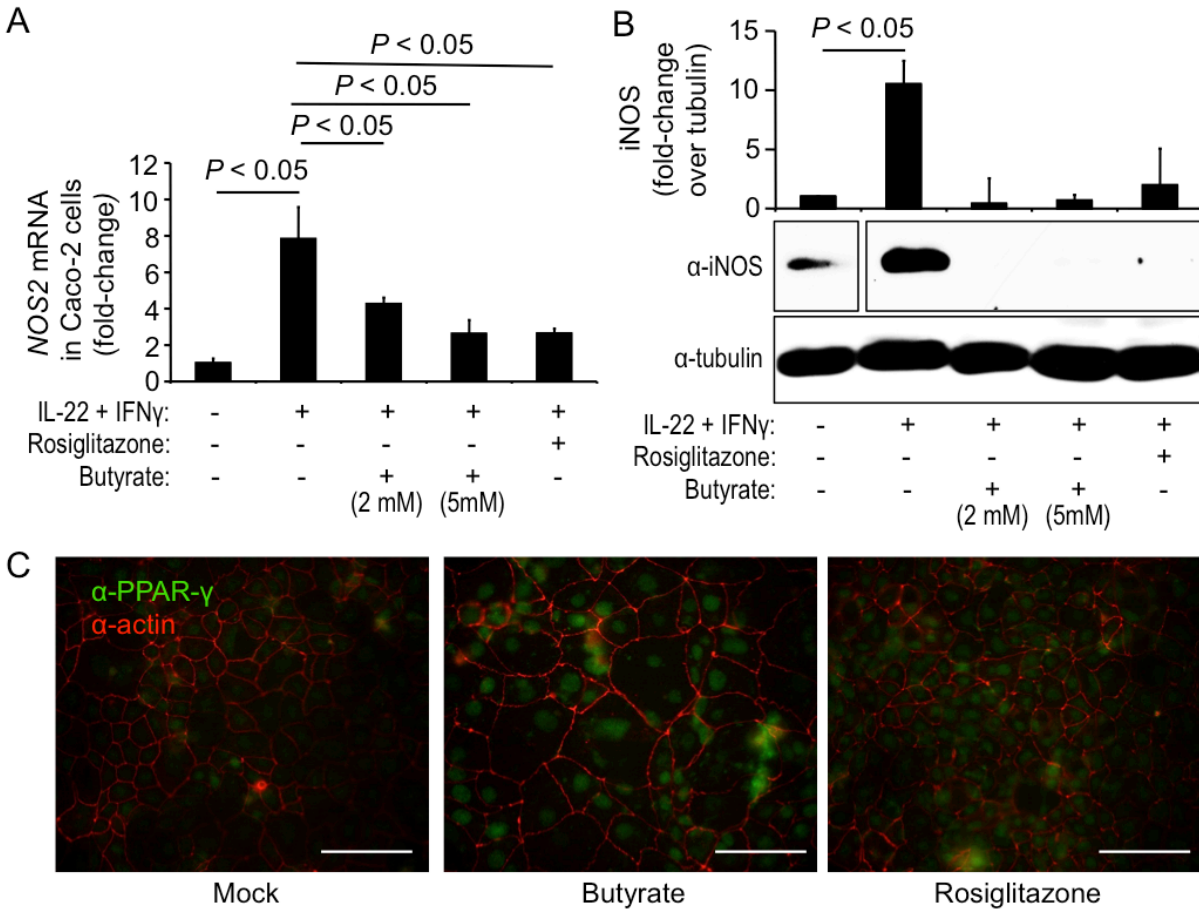

1  
 2 **Figure S2: PPAR- $\gamma$  agonists repress iNOS synthesis in human colonic cancer epithelial**  
 3 **(Caco-2) cells.** Caco-2 cells ( $N = 4$ ) were treated with the indicated cytokines and/or the PPAR-  
 4  $\gamma$  agonists butyrate or rosiglitazone. (A) NOS2 expression was determined by real-time PCR.  
 5 (B) Synthesis of iNOS was detected by Western blot (a representative image is shown in the  
 6 middle panel) using tubulin as a loading control (a representative image is shown in the bottom  
 7 panel). Quantification of the results is shown in the top panel. (C) Images showing expression of  
 8 actin (red fluorescence) and PPAR- $\gamma$  (green fluorescence) in Caco-2 cells grown in a  
 9 microfluidic chamber. Scale bars represent 50  $\mu$ m.

10

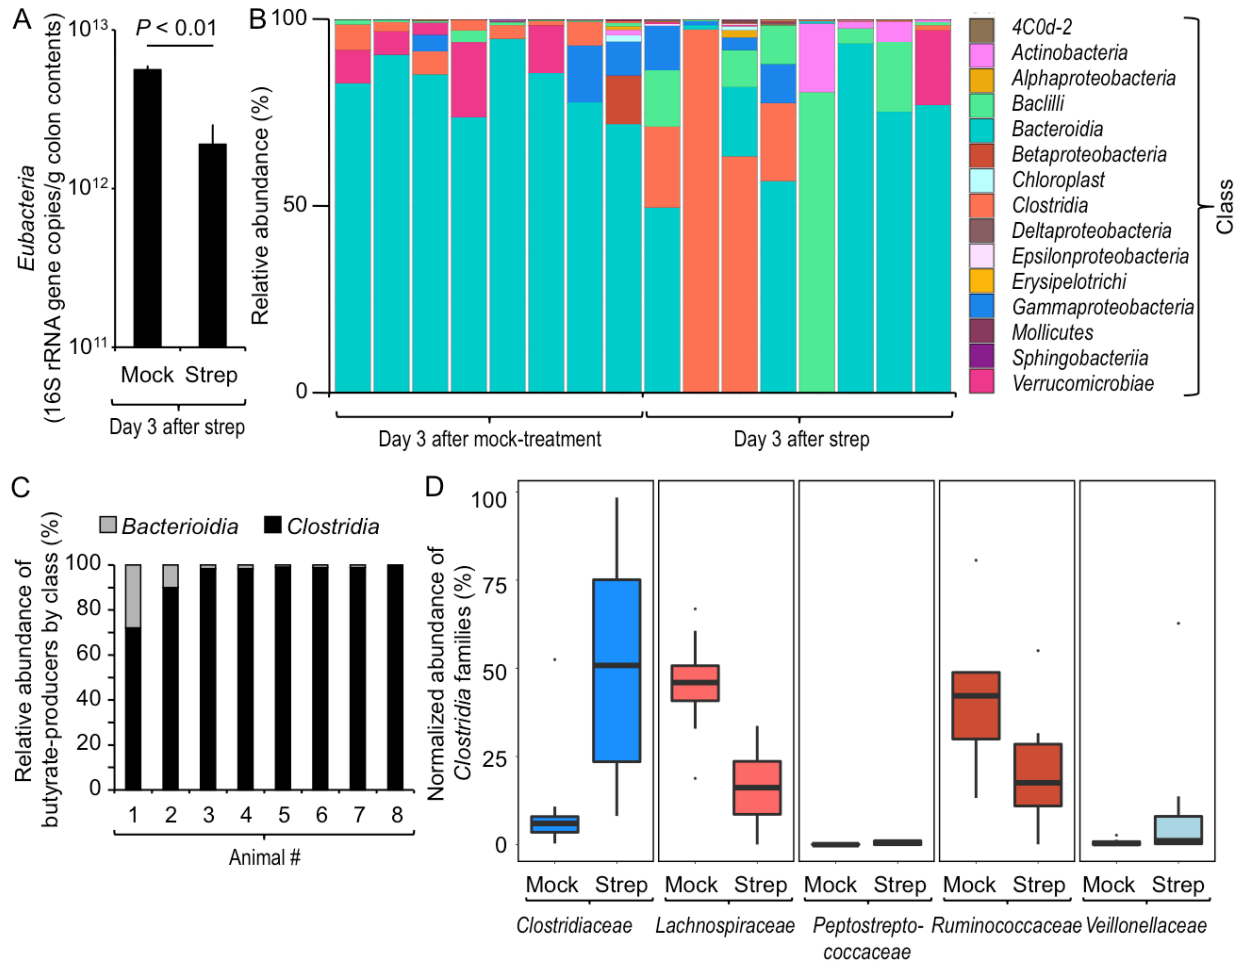

1

2 **Figure S3: Effect of streptomycin treatment on the gut microbiota.**

3 (A-D) Mice ( $N = 8$ ) were mock-treated or treated with streptomycin. (A) The copy number of 16S

4 rRNA genes was determined in DNA isolated from colon contents. Bars represent geometric

5 means  $\pm$  standard error. (B) Community composition at the class level was determined by 16S

6 profiling of DNA isolated from colon contents. (C) Relative abundances of OTUs from butyrate-

7 producing families, plotted according to their class affiliation. (D) Normalized abundance of

8 families belonging to the class Clostridia in colon contents was determined by 16S profiling.

9 Boxes in whisker plots represent the second and third quartiles, while lines indicate the first and

10 fourth quartiles.

11

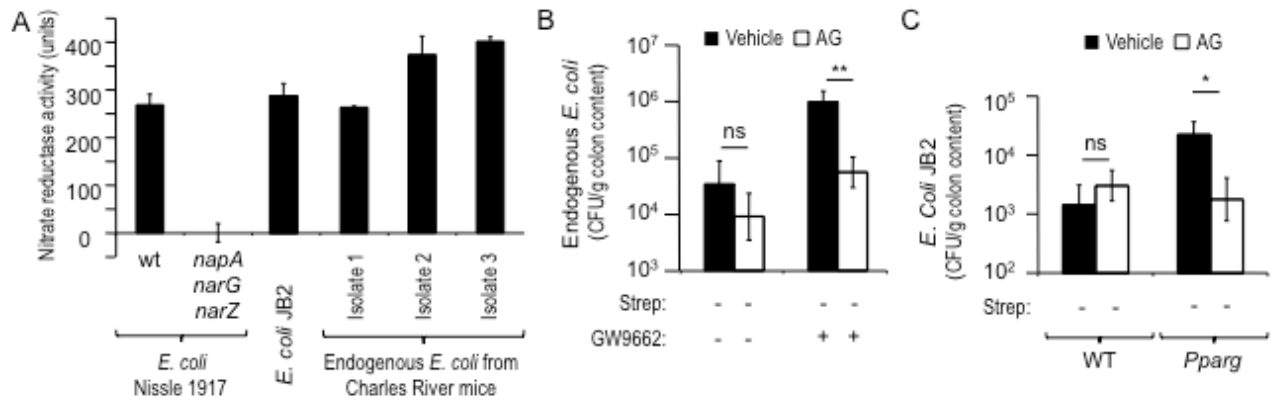

1  
2 **Figure S4: Treatment with a PPAR- $\gamma$  antagonist drives an iNOS-dependent expansion of**  
3 **endogenous *E. coli* in mice from Charles River.** (A) Nitrate reductase activity was  
4 determined (N = 3) in *E. coli* Nissle 1917 wild type (wt), an isogenic *napA narG narZ* mutant, *E.*  
5 *coli* JB2 and endogenous *E. coli* isolates from C57BL/6 mice purchased from Charles River. (B)  
6 Mice from Charles River (N = 6) were mock-treated or inoculated with the PPAR- $\gamma$  antagonist  
7 GW9662 and received aminoguanidine (AG) supplementation or vehicle control. (C) Groups (N  
8 = 5) of mice lacking epithelial *Pparg* expression (*Pparg*) or littermate controls (WT) were  
9 infected with *E. coli* strain JB2 and received either AG supplementation or vehicle control. (B  
10 and C) The abundance of endogenous *E. coli* was determined by spreading dilutions on  
11 McConkey agar. Bars represent geometric means  $\pm$  standard error. \*,  $P < 0.05$ ; \*\*,  $P < 0.01$ ; ns,  
12 not statistically significantly different.

13

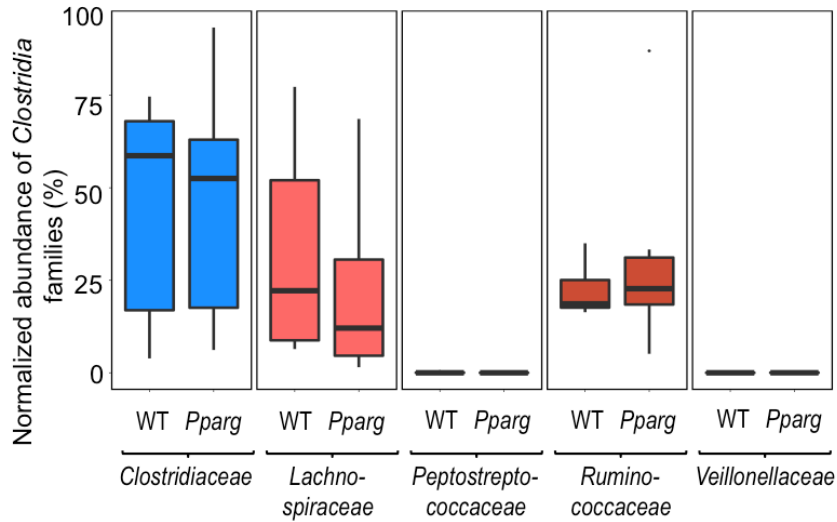

1  
 2 **Figure S5: Abundance of Clostridia families in mice lacking epithelial PPAR- $\gamma$  signaling**  
 3 **and littermate control animals.** Comparison of mice ( $N = 6$ ) lacking epithelial PPAR- $\gamma$   
 4 signaling ( $Pparg^{fl/fl} Villin^{cre/-}$ ) with their littermate controls ( $Pparg^{fl/fl} Villin^{-/-}$ ). Normalized abundance  
 5 of families belonging to the class Clostridia in colon contents was determined by 16S profiling.

6

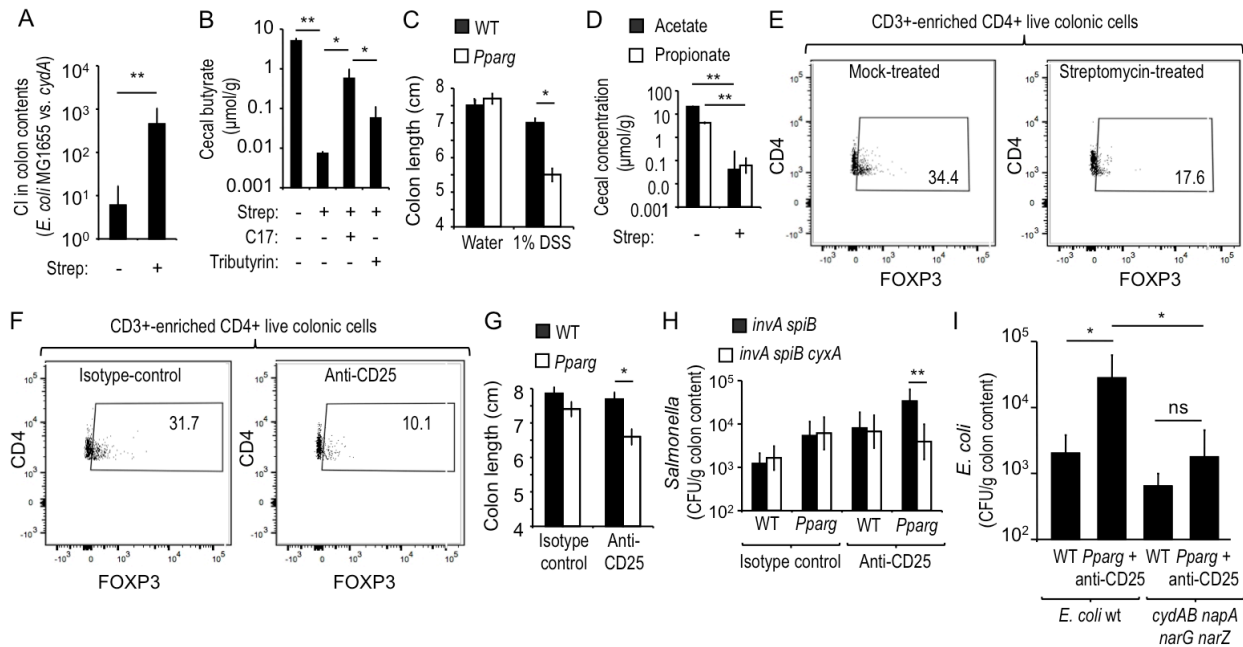

1  
2 **Figure S6: Depletion of regulatory T cells in mice lacking epithelial PPAR- $\gamma$  signaling**  
3 **increases growth of *Salmonella* by aerobic respiration.** (A) Groups ( $N = 6$ ) of streptomycin-  
4 treated or mock-treated mice were inoculated with a 1:1 mixture of *E. coli* strain MG1655 and an  
5 isogenic *cydA* mutant. The competitive index (CI) was determined 2 days after inoculation. (B  
6 and D) Levels of butyrate (B), acetate and propionate (D) were measured by gas  
7 chromatography in the cecum of mice ( $N = 6$ ) three days after treatment with streptomycin or  
8 mock treatment. (C) Groups of mice ( $N = 6$ ) receiving no supplementation or water  
9 supplemented with 1% dextran sulfate sodium (DSS) were inoculated with *E. coli* indicator  
10 strains five days later (see Fig. 2D) and colon length was determined after 8 days of DSS  
11 treatment. (E and F) Groups of mice ( $N = 4$ ) were treated with streptomycin (E) or with anti-  
12 CD25 antibody (F) and CD3<sup>+</sup>-enriched live colonic cells analyzed for expression of CD4 and  
13 FOXP3 by flow cytometry. Representative flow panels are shown. Boxes indicate the gates set  
14 for the detection of T<sub>regs</sub> using fluorescence-minus-one controls. (G) Groups of mice ( $N = 6$ )  
15 were treated with anti-CD25 antibody or isotype control and colon length was determined 14  
16 days later. (H) Groups of mice ( $N = 6$ ) were treated with anti-CD25 antibody or isotype control

1 and 10 days later inoculated with the indicated *Salmonella* indicator strains. Bacterial numbers  
2 were determined 4 days after infection. (I) Mice were infected with either the *E. coli* Nissle 1917  
3 wild-type (wt) or an isogenic *cydA napA narG narZ* mutant and bacterial numbers recovered  
4 from colon contents four days after infection. \*,  $P < 0.05$ ; \*\*,  $P < 0.01$ ; ns, not statistically  
5 significantly different.

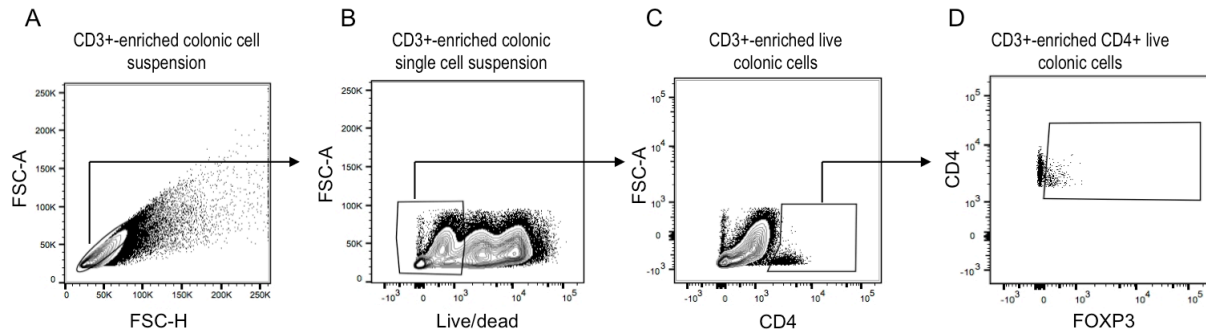

1  
 2 **Figure S7: Gating strategy for analyzing colonic regulatory T cells.** A cell suspension of the  
 3 colon was enriched for T cells by high-affinity negative selection using a T cell enrichment  
 4 column. (A) The resulting CD3<sup>+</sup>-enriched colonic cell suspension was gated for single cells  
 5 using forward scatter pulse area (FSC-A) versus forward scatter pulse height (FSC-H). The  
 6 CD3<sup>+</sup>-enriched colonic single cell suspension was gated for live cells (B), followed by gating for  
 7 CD4<sup>+</sup> cells (C). (D) Finally, FOXP3 expression was detected in CD3<sup>+</sup>-enriched CD4<sup>+</sup> live colonic  
 8 cells to identify regulatory T cells. (B-D) Gates were set using fluorescence-minus-one controls.

9  
 10
